# Supplementary material for: Flood exposure and poverty in 188 countries
Source: PubMed Central journal article supplement (PMC9240081; doi:10.1038/s41467-022-30727-4), 2022-06-28
Supplement: 41467_2022_30727_MOESM1_ESM.pdf [file 41467_2022_30727_MOESM1_ESM.pdf]

## Supplementary Information: Flood exposure and poverty in 188 countries

Jun Rentschler<sup>1,2\*</sup>, Melda Salhab<sup>1,3</sup>, Bramka Arga Jafino<sup>4,5</sup>

### Supplementary Note 1. Stepwise computational process

The following steps are repeated for each subnational region where data is available.

#### Merge coastal, pluvial, fluvial flood hazard maps (Supplementary Figure 1.)

- Crop fluvial and pluvial flood rasters to subnational (admin-1) boundary
- Crop and then virtually warp the coastal flood raster, using a nearest neighbors resampling method, to perfectly match the resolution and extent of the fluvial and pluvial rasters
- Merge fluvial, pluvial, and coastal rasters using a maximum value method

| Coastal |   |     |      | Pluvial |   |   |   | Fluvial |      |   |   | Combined Flood Hazard |      |     |      |
|---------|---|-----|------|---------|---|---|---|---------|------|---|---|-----------------------|------|-----|------|
| 0       | 0 | 0   | 0.1  | 1.2     | 0 | 0 | 0 | 1.6     | 0.9  | 0 | 0 | 1.6                   | 0.9  | 0   | 0.1  |
| 0       | 0 | 0   | 0.12 | 0.8     | 0 | 0 | 0 | 0.6     | 0.02 | 0 | 0 | 0.8                   | 0.02 | 0   | 0.12 |
| 0       | 0 | 0   | 1.6  | 0.4     | 0 | 0 | 0 | 0       | 0    | 0 | 0 | 0.4                   | 0    | 0   | 1.6  |
| 0       | 0 | 0.7 | 999  | 0.14    | 0 | 0 | 0 | 0       | 0    | 0 | 0 | 0.14                  | 0    | 0.7 | 999  |

Supplementary Figure 1. Merger of three flood layers

#### Categorize the flood raster (Supplementary Figure 2.)

- Using the pre-defined flood categories and a category for water bodies, categorize the value of each pixel

| Combined Flood Hazard |      |     |      | Categorized |   |   |   |
|-----------------------|------|-----|------|-------------|---|---|---|
| 1.6                   | 0.9  | 0   | 0.1  | 4           | 3 | 0 | 1 |
| 0.8                   | 0.02 | 0   | 0.12 | 3           | 1 | 0 | 1 |
| 0.4                   | 0    | 0   | 1.6  | 2           | 0 | 0 | 4 |
| 0.14                  | 0    | 0.7 | 999  | 1           | 0 | 3 | 5 |

Supplementary Figure 2. Flood risk categorization

#### Convert to Boolean integer raster (Supplementary Figure 3.)

- Convert the country raster into six different rasters, one for each flood bin
- Convert each raster for each flood bin to a Boolean (true / false) integer array, where 1 represents the presence of flood risk level in the specific pixel, and 0 represents no presence of flood risk for that pixel

<sup>1</sup> The World Bank, Washington DC, USA

<sup>2</sup> Payne Institute for Public Policy, Denver, USA

<sup>3</sup> Center for Advanced Spatial Analysis, University College London, London, UK

<sup>4</sup> Deltares, Delft, The Netherlands

<sup>5</sup> Faculty of Technology, Policy, and Management, Delft University of Technology, Delft, The Netherlands

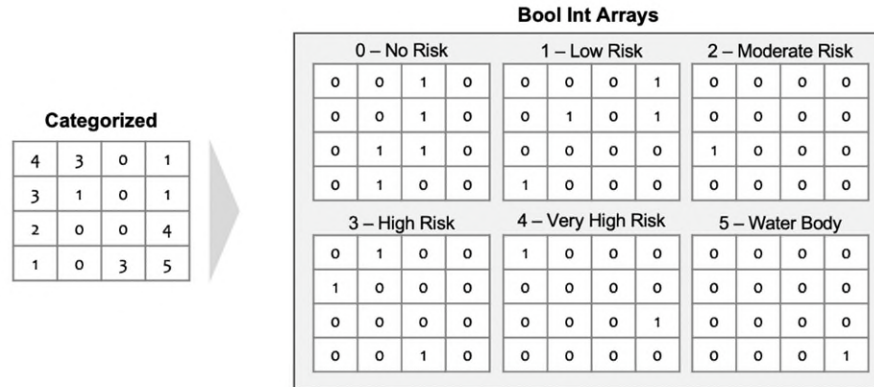

**Supplementary Figure 3. Separating flood categories**

**Multiply each flood array by the population array (Supplementary Figure 4.)**

- Crop and virtually warp the population raster to perfectly match the flood raster
- For each flood risk array, multiply the array by the population
- Each flood array pixel is multiplied by the corresponding population array pixel
- The 1/0 structure allows the resulting array to capture population data for the specific flood risk level

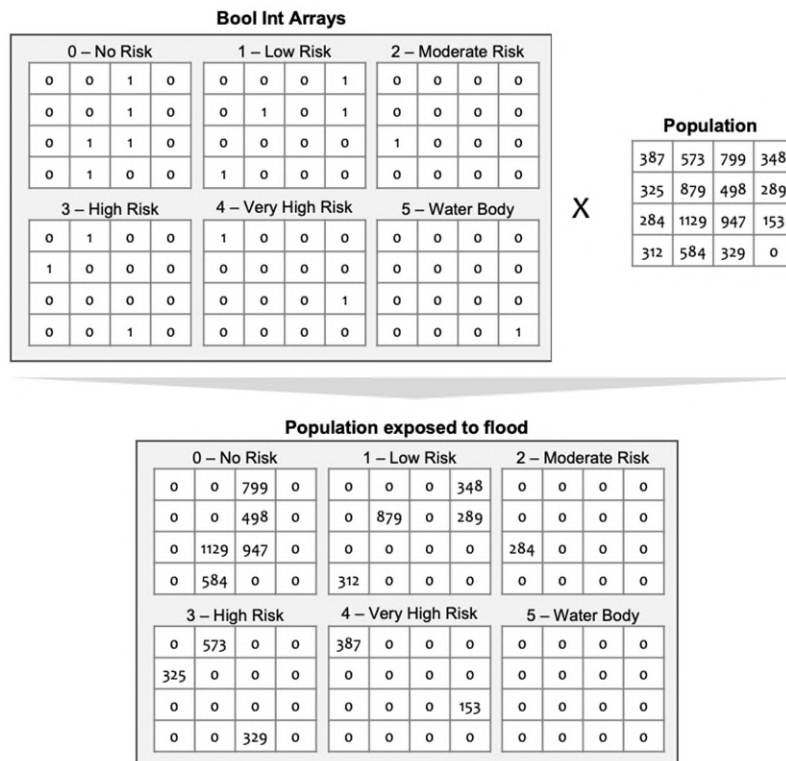

X

| Population |      |     |     |
|------------|------|-----|-----|
| 387        | 573  | 799 | 348 |
| 325        | 879  | 498 | 289 |
| 284        | 1129 | 947 | 153 |
| 312        | 584  | 329 | 0   |

**Supplementary Figure 4. Overlay of flood risk and population layers**

**Calculate sums**

- For each flood risk array, calculate the total number of people exposed and add the results to the World Bank global administrative map shapefile

## Supplementary Note 2. Sensitivity of results to threshold choice

Supplementary Figure 5. shows the number of people who are exposed to pluvial, fluvial, or coastal flooding of at least a certain inundation depth during a 1-in-100 year event. Headcount estimates for the exposure to pluvial flooding are most sensitive to threshold changes. The sensitivity of coastal flood exposure does not significantly affect the overall exposure headcount estimates (from 165 million people when threshold is set at 15 cm to 132 million people with a threshold of 100 cm). Note that locations are often exposed to more than one flood type, hence summing exposure headcounts of individual flood types would result in double counting.

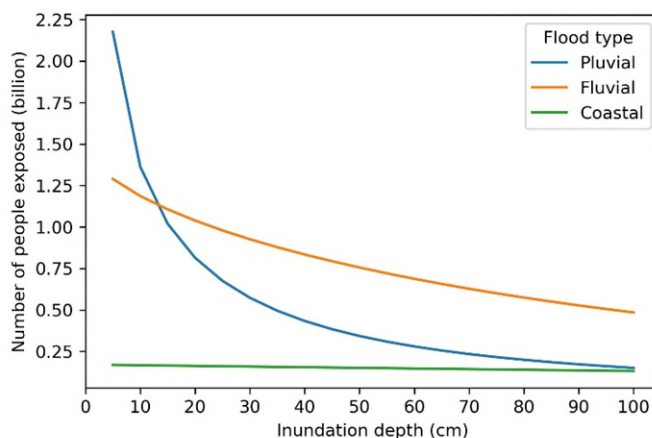

Supplementary Figure 5. Sensitivity analysis of global flood exposure to individual flood types

## Supplementary Note 3. Country level summary results

Supplementary Table 1. Exposure headcount estimates at the country level

|    |                     | Total population | Population exposed to high flood risk |                 | Population exposed to high flood risk and poor (\$1.9 per day) |                 | Population exposed to high flood risk and poor (\$3.2 per day) |                 | Population exposed to high flood risk and poor (\$5.5 per day) |                 |
|----|---------------------|------------------|---------------------------------------|-----------------|----------------------------------------------------------------|-----------------|----------------------------------------------------------------|-----------------|----------------------------------------------------------------|-----------------|
|    |                     | ('000)           | Total ('000)                          | % of population | Total ('000)                                                   | % of population | Total ('000)                                                   | % of population | Total ('000)                                                   | % of population |
| 1  | Afghanistan         | 30,296           | 4,501                                 | 14.9            | 0                                                              | 0.0             | 0                                                              | 0.0             | 0                                                              | 0.0             |
| 2  | Albania             | 2,797            | 771                                   | 27.6            | 8                                                              | 0.3             | 50                                                             | 1.8             | 240                                                            | 8.6             |
| 3  | Algeria             | 44,084           | 4,875                                 | 11.1            | 16                                                             | 0.0             | 110                                                            | 0.2             | 1,021                                                          | 2.3             |
| 4  | Andorra             | 113              | 28                                    | 25.0            | 0                                                              | 0.0             | 0                                                              | 0.0             | 0                                                              | 0.0             |
| 5  | Angola              | 36,246           | 3,732                                 | 10.3            | 1,797                                                          | 5.0             | 2,614                                                          | 7.2             | 3,280                                                          | 9.1             |
| 6  | Antigua and Barbuda | 93               | 9                                     | 9.9             | 0                                                              | 0.0             | 0                                                              | 0.0             | 0                                                              | 0.0             |
| 7  | Argentina           | 44,827           | 7,215                                 | 16.1            | 0                                                              | 0.0             | 0                                                              | 0.0             | 0                                                              | 0.0             |
| 8  | Armenia             | 2,773            | 406                                   | 14.6            | 5                                                              | 0.2             | 37                                                             | 1.3             | 173                                                            | 6.3             |
| 9  | Australia           | 20,804           | 1,654                                 | 7.9             | 8                                                              | 0.0             | 13                                                             | 0.1             | 13                                                             | 0.1             |
| 10 | Austria             | 8,761            | 2,437                                 | 27.8            | 8                                                              | 0.1             | 10                                                             | 0.1             | 16                                                             | 0.2             |
| 11 | Azerbaijan          | 8,646            | 1,520                                 | 17.6            | 0                                                              | 0.0             | 0                                                              | 0.0             | 0                                                              | 0.0             |
| 12 | Bahamas             | 385              | 81                                    | 21.1            | 0                                                              | 0.0             | 0                                                              | 0.0             | 0                                                              | 0.0             |

|    |                          |           |         |      |        |      |        |      |        |      |
|----|--------------------------|-----------|---------|------|--------|------|--------|------|--------|------|
| 13 | Bangladesh               | 164,109   | 94,424  | 57.5 | 7,504  | 4.6  | 38,612 | 23.5 | 73,349 | 44.7 |
| 14 | Barbados                 | 284       | 20      | 6.9  | 0      | 0.0  | 0      | 0.0  | 0      | 0.0  |
| 15 | Belarus                  | 9,157     | 882     | 9.6  | 0      | 0.0  | 0      | 0.0  | 4      | 0.0  |
| 16 | Belgium                  | 11,580    | 2,070   | 17.9 | 2      | 0.0  | 3      | 0.0  | 5      | 0.0  |
| 17 | Belize                   | 414       | 88      | 21.4 | 10     | 2.4  | 21     | 5.1  | 40     | 9.8  |
| 18 | Benin                    | 12,990    | 1,950   | 15.0 | 899    | 6.9  | 1,433  | 11.0 | 1,772  | 13.6 |
| 19 | Bhutan                   | 813       | 63      | 7.7  | 0      | 0.1  | 5      | 0.6  | 20     | 2.4  |
| 20 | Bolivia                  | 11,832    | 1,875   | 15.8 | 66     | 0.6  | 165    | 1.4  | 381    | 3.2  |
| 21 | Bosnia and Herzegovina   | 3,324     | 635     | 19.1 | 0      | 0.0  | 2      | 0.0  | 13     | 0.4  |
| 22 | Botswana                 | 2,401     | 294     | 12.2 | 39     | 1.6  | 104    | 4.4  | 176    | 7.3  |
| 23 | Brazil                   | 216,999   | 25,408  | 11.7 | 1,256  | 0.6  | 2,579  | 1.2  | 5,491  | 2.5  |
| 24 | Brunei Darussalam        | 453       | 115     | 25.4 | 0      | 0.0  | 0      | 0.0  | 0      | 0.0  |
| 25 | Bulgaria                 | 6,892     | 1,184   | 17.2 | 14     | 0.2  | 34     | 0.5  | 85     | 1.2  |
| 26 | Burkina Faso             | 22,781    | 3,289   | 14.4 | 1,148  | 5.0  | 2,339  | 10.3 | 2,971  | 13.0 |
| 27 | Burundi                  | 11,346    | 1,252   | 11.0 | 974    | 8.6  | 1,153  | 10.2 | 1,224  | 10.8 |
| 28 | Cabo Verde               | 508       | 27      | 5.3  | 1      | 0.1  | 3      | 0.6  | 10     | 1.9  |
| 29 | Cambodia                 | 19,523    | 7,431   | 38.1 | 0      | 0.0  | 0      | 0.0  | 0      | 0.0  |
| 30 | Cameroon                 | 28,043    | 5,348   | 19.1 | 1,468  | 5.2  | 2,592  | 9.2  | 3,803  | 13.6 |
| 31 | Canada                   | 36,782    | 3,450   | 9.4  | 7      | 0.0  | 17     | 0.0  | 27     | 0.1  |
| 32 | Cayman Islands           | 73        | 12      | 16.3 | 0      | 0.0  | 0      | 0.0  | 0      | 0.0  |
| 33 | Central African Republic | 5,347     | 1,036   | 19.4 | 704    | 13.2 | 867    | 16.2 | 967    | 18.1 |
| 34 | Chad                     | 16,589    | 4,547   | 27.4 | 1,591  | 9.6  | 2,804  | 16.9 | 3,797  | 22.9 |
| 35 | Chile                    | 20,672    | 3,484   | 16.9 | 10     | 0.0  | 22     | 0.1  | 116    | 0.6  |
| 36 | China                    | 1,437,455 | 394,826 | 27.5 | 4,289  | 0.3  | 0      | 0.0  | 0      | 0.0  |
| 37 | Colombia                 | 63,257    | 14,507  | 22.9 | 577    | 0.9  | 1,578  | 2.5  | 3,981  | 6.3  |
| 38 | Comoros                  | 846       | 74      | 8.7  | 11     | 1.4  | 28     | 3.3  | 49     | 5.7  |
| 39 | Congo Republic           | 3,997     | 1,170   | 29.3 | 686    | 17.2 | 907    | 22.7 | 1,057  | 26.4 |
| 40 | Costa Rica               | 4,817     | 948     | 19.7 | 16     | 0.3  | 41     | 0.8  | 121    | 2.5  |
| 41 | Cote d'Ivoire            | 26,537    | 3,484   | 13.1 | 866    | 3.3  | 1,894  | 7.1  | 2,808  | 10.6 |
| 42 | Croatia                  | 4,061     | 1,094   | 26.9 | 6      | 0.1  | 11     | 0.3  | 35     | 0.9  |
| 43 | Cuba                     | 11,114    | 2,026   | 18.2 | 0      | 0.0  | 0      | 0.0  | 0      | 0.0  |
| 44 | Cyprus                   | 1,286     | 145     | 11.3 | 0      | 0.0  | 0      | 0.0  | 0      | 0.0  |
| 45 | Czech Republic           | 10,816    | 1,500   | 13.9 | 1      | 0.0  | 2      | 0.0  | 5      | 0.1  |
| 46 | DR Congo                 | 114,168   | 15,797  | 13.8 | 11,869 | 10.4 | 14,344 | 12.6 | 15,420 | 13.5 |
| 47 | Denmark                  | 5,888     | 541     | 9.2  | 0      | 0.0  | 0      | 0.0  | 1      | 0.0  |
| 48 | Djibouti                 | 1,153     | 73      | 6.3  | 18     | 1.6  | 34     | 3.0  | 54     | 4.7  |
| 49 | Dominica                 | 69        | 6       | 9.0  | 0      | 0.0  | 0      | 0.0  | 0      | 0.0  |

|    |                    |           |         |      |        |      |         |      |         |      |
|----|--------------------|-----------|---------|------|--------|------|---------|------|---------|------|
| 50 | Dominican Republic | 12,045    | 1,784   | 14.8 | 8      | 0.1  | 50      | 0.4  | 258     | 2.1  |
| 51 | Ecuador            | 17,617    | 3,726   | 21.1 | 111    | 0.6  | 319     | 1.8  | 857     | 4.9  |
| 52 | Egypt              | 96,019    | 38,871  | 40.5 | 1,628  | 1.7  | 12,331  | 12.8 | 29,363  | 30.6 |
| 53 | El Salvador        | 6,739     | 1,132   | 16.8 | 17     | 0.3  | 94      | 1.4  | 309     | 4.6  |
| 54 | Equatorial Guinea  | 1,295     | 211     | 16.3 | 0      | 0.0  | 0       | 0.0  | 0       | 0.0  |
| 55 | Eritrea            | 4,163     | 391     | 9.4  | 0      | 0.0  | 0       | 0.0  | 0       | 0.0  |
| 56 | Estonia            | 1,391     | 99      | 7.1  | 0      | 0.0  | 0       | 0.0  | 1       | 0.1  |
| 57 | Eswatini           | 1,096     | 99      | 9.0  | 28     | 2.6  | 51      | 4.7  | 71      | 6.4  |
| 58 | Ethiopia           | 103,809   | 11,586  | 11.2 | 2,752  | 2.7  | 6,955   | 6.7  | 10,209  | 9.8  |
| 59 | Faeroe Islands     | 51        | 3       | 6.3  | 0      | 0.0  | 0       | 0.0  | 0       | 0.0  |
| 60 | Fiji               | 699       | 162     | 23.1 | 0      | 0.1  | 6       | 0.8  | 34      | 4.8  |
| 61 | Finland            | 5,606     | 612     | 10.9 | 0      | 0.0  | 1       | 0.0  | 1       | 0.0  |
| 62 | France             | 67,353    | 11,632  | 17.3 | 0      | 0.0  | 2       | 0.0  | 5       | 0.0  |
| 63 | Gabon              | 2,972     | 579     | 19.5 | 17     | 0.6  | 62      | 2.1  | 186     | 6.3  |
| 64 | Gambia             | 2,395     | 370     | 15.4 | 40     | 1.6  | 146     | 6.1  | 275     | 11.5 |
| 65 | Georgia            | 3,728     | 695     | 18.6 | 29     | 0.8  | 104     | 2.8  | 281     | 7.5  |
| 66 | Germany            | 78,292    | 13,670  | 17.5 | 12     | 0.0  | 33      | 0.0  | 68      | 0.1  |
| 67 | Ghana              | 32,954    | 4,716   | 14.3 | 583    | 1.8  | 1,364   | 4.1  | 2,564   | 7.8  |
| 68 | Greece             | 10,221    | 1,314   | 12.9 | 11     | 0.1  | 20      | 0.2  | 57      | 0.6  |
| 69 | Grenada            | 99        | 9       | 8.8  | 0      | 0.0  | 0       | 0.0  | 0       | 0.0  |
| 70 | Guam               | 164       | 15      | 9.5  | 0      | 0.0  | 0       | 0.0  | 0       | 0.0  |
| 71 | Guatemala          | 18,257    | 2,421   | 13.3 | 170    | 0.9  | 502     | 2.7  | 1,068   | 5.8  |
| 72 | Guinea             | 12,167    | 2,306   | 19.0 | 491    | 4.0  | 1,259   | 10.3 | 1,973   | 16.2 |
| 73 | Guinea-Bissau      | 1,763     | 301     | 17.1 | 189    | 10.7 | 248     | 14.1 | 278     | 15.8 |
| 74 | Guyana             | 728       | 276     | 37.9 | 13     | 1.8  | 32      | 4.4  | 71      | 9.7  |
| 75 | Haiti              | 14,625    | 2,553   | 17.5 | 614    | 4.2  | 1,268   | 8.7  | 2,002   | 13.7 |
| 76 | Honduras           | 9,449     | 1,801   | 19.1 | 261    | 2.8  | 496     | 5.3  | 861     | 9.1  |
| 77 | Hong Kong          | 6,032     | 720     | 11.9 | 0      | 0.0  | 0       | 0.0  | 0       | 0.0  |
| 78 | Hungary            | 9,344     | 1,489   | 15.9 | 7      | 0.1  | 17      | 0.2  | 41      | 0.4  |
| 79 | Iceland            | 360       | 53      | 14.9 | 0      | 0.0  | 0       | 0.0  | 0       | 0.0  |
| 80 | India              | 1,405,691 | 389,816 | 27.7 | 65,646 | 4.7  | 222,969 | 15.9 | 334,064 | 23.8 |
| 81 | Indonesia          | 280,224   | 75,696  | 27.0 | 2,630  | 0.9  | 15,964  | 5.7  | 39,962  | 14.3 |
| 82 | Iran               | 80,139    | 11,738  | 14.6 | 34     | 0.0  | 313     | 0.4  | 1,653   | 2.1  |
| 83 | Iraq               | 44,427    | 16,350  | 36.8 | 279    | 0.6  | 2,385   | 5.4  | 8,707   | 19.6 |
| 84 | Ireland            | 5,482     | 738     | 13.5 | 0      | 0.0  | 3       | 0.1  | 4       | 0.1  |
| 85 | Israel             | 8,557     | 639     | 7.5  | 1      | 0.0  | 3       | 0.0  | 13      | 0.2  |
| 86 | Italy              | 61,665    | 8,504   | 13.8 | 92     | 0.1  | 120     | 0.2  | 192     | 0.3  |
| 87 | Jamaica            | 2,721     | 395     | 14.5 | 7      | 0.3  | 37      | 1.4  | 118     | 4.3  |
| 88 | Japan              | 125,792   | 36,060  | 28.7 | 270    | 0.2  | 350     | 0.3  | 455     | 0.4  |
| 89 | Jordan             | 7,138     | 455     | 6.4  | 1      | 0.0  | 13      | 0.2  | 105     | 1.5  |

|     |                 |         |        |      |        |      |        |      |        |      |
|-----|-----------------|---------|--------|------|--------|------|--------|------|--------|------|
| 90  | Kazakhstan      | 18,074  | 3,144  | 17.4 | 1      | 0.0  | 9      | 0.1  | 179    | 1.0  |
| 91  | Kenya           | 55,137  | 6,566  | 11.9 | 2,369  | 4.3  | 4,339  | 7.9  | 5,714  | 10.4 |
| 92  | Kuwait          | 3,522   | 301    | 8.5  | 0      | 0.0  | 0      | 0.0  | 0      | 0.0  |
| 93  | Kyrgyz Republic | 5,659   | 907    | 16.0 | 4      | 0.1  | 85     | 1.5  | 461    | 8.1  |
| 94  | Laos            | 7,527   | 2,985  | 39.7 | 218    | 2.9  | 927    | 12.3 | 1,994  | 26.5 |
| 95  | Latvia          | 2,456   | 554    | 22.6 | 4      | 0.2  | 8      | 0.3  | 17     | 0.7  |
| 96  | Lebanon         | 9,337   | 872    | 9.3  | 0      | 0.0  | 1      | 0.0  | 16     | 0.2  |
| 97  | Lesotho         | 1,885   | 151    | 8.0  | 41     | 2.2  | 75     | 4.0  | 111    | 5.9  |
| 98  | Liberia         | 4,543   | 1,197  | 26.4 | 441    | 9.7  | 833    | 18.3 | 1,090  | 24.0 |
| 99  | Libya           | 6,921   | 701    | 10.1 | 0      | 0.0  | 0      | 0.0  | 0      | 0.0  |
| 100 | Lithuania       | 2,748   | 333    | 12.1 | 3      | 0.1  | 5      | 0.2  | 12     | 0.4  |
| 101 | Luxembourg      | 590     | 69     | 11.7 | 0      | 0.0  | 0      | 0.0  | 1      | 0.1  |
| 102 | Macedonia       | 2,097   | 397    | 18.9 | 16     | 0.7  | 31     | 1.5  | 72     | 3.4  |
| 103 | Madagascar      | 27,625  | 5,379  | 19.5 | 3,862  | 14.0 | 4,703  | 17.0 | 5,168  | 18.7 |
| 104 | Malawi          | 18,470  | 3,057  | 16.5 | 2,212  | 12.0 | 2,776  | 15.0 | 2,976  | 16.1 |
| 105 | Malaysia        | 34,193  | 8,194  | 24.0 | 1      | 0.0  | 11     | 0.0  | 160    | 0.5  |
| 106 | Mali            | 23,243  | 5,129  | 22.1 | 2,243  | 9.6  | 3,915  | 16.8 | 4,816  | 20.7 |
| 107 | Malta           | 424     | 22     | 5.2  | 0      | 0.0  | 0      | 0.0  | 0      | 0.0  |
| 108 | Mauritania      | 4,448   | 579    | 13.0 | 46     | 1.0  | 171    | 3.9  | 380    | 8.5  |
| 109 | Mauritius       | 1,277   | 169    | 13.2 | 0      | 0.0  | 2      | 0.2  | 18     | 1.4  |
| 110 | Mexico          | 140,328 | 24,089 | 17.2 | 408    | 0.3  | 1,533  | 1.1  | 5,434  | 3.9  |
| 111 | Micronesia      | 59      | 2      | 3.6  | 0      | 0.4  | 1      | 1.3  | 1      | 2.4  |
| 112 | Moldova         | 3,673   | 496    | 13.5 | 0      | 0.0  | 4      | 0.1  | 60     | 1.6  |
| 113 | Monaco          | 0       | 0      | 0.0  | 0      | 0.0  | 0      | 0.0  | 0      | 0.0  |
| 114 | Mongolia        | 3,159   | 458    | 14.5 | 2      | 0.1  | 23     | 0.7  | 120    | 3.8  |
| 115 | Montenegro      | 603     | 110    | 18.3 | 1      | 0.1  | 6      | 1.0  | 15     | 2.4  |
| 116 | Morocco         | 35,638  | 3,924  | 11.0 | 27     | 0.1  | 217    | 0.6  | 992    | 2.8  |
| 117 | Mozambique      | 30,851  | 5,002  | 16.2 | 3,233  | 10.5 | 4,175  | 13.5 | 4,650  | 15.1 |
| 118 | Myanmar         | 47,823  | 19,104 | 39.9 | 193    | 0.4  | 2,159  | 4.5  | 9,227  | 19.3 |
| 119 | Namibia         | 2,438   | 423    | 17.3 | 68     | 2.8  | 147    | 6.0  | 241    | 9.9  |
| 120 | Nepal           | 40,735  | 11,993 | 29.4 | 686    | 1.7  | 4,053  | 9.9  | 8,492  | 20.8 |
| 121 | Netherlands     | 17,196  | 10,100 | 58.7 | 16     | 0.1  | 26     | 0.2  | 37     | 0.2  |
| 122 | New Caledonia   | 270     | 46     | 17.0 | 0      | 0.0  | 0      | 0.0  | 0      | 0.0  |
| 123 | New Zealand     | 4,393   | 623    | 14.2 | 0      | 0.0  | 0      | 0.0  | 0      | 0.0  |
| 124 | Nicaragua       | 6,881   | 1,147  | 16.7 | 31     | 0.4  | 134    | 1.9  | 373    | 5.4  |
| 125 | Niger           | 23,865  | 3,350  | 14.0 | 1,393  | 5.8  | 2,496  | 10.5 | 3,098  | 13.0 |
| 126 | Nigeria         | 216,151 | 38,994 | 18.0 | 15,204 | 7.0  | 26,638 | 12.3 | 34,173 | 15.8 |
| 127 | North Korea     | 23,224  | 5,735  | 24.7 | 0      | 0.0  | 0      | 0.0  | 0      | 0.0  |
| 128 | Norway          | 5,223   | 456    | 8.7  | 1      | 0.0  | 1      | 0.0  | 2      | 0.0  |
| 129 | Oman            | 3,587   | 184    | 5.1  | 0      | 0.0  | 0      | 0.0  | 0      | 0.0  |

|     |                       |         |        |      |       |      |        |      |        |      |
|-----|-----------------------|---------|--------|------|-------|------|--------|------|--------|------|
| 130 | Pakistan              | 230,904 | 71,786 | 31.1 | 1,161 | 0.5  | 17,304 | 7.5  | 46,890 | 20.3 |
| 131 | Palau                 | 25      | 2      | 6.1  | 0     | 0.0  | 0      | 0.0  | 0      | 0.0  |
| 132 | Panama                | 4,058   | 625    | 15.4 | 10    | 0.2  | 31     | 0.8  | 82     | 2.0  |
| 133 | Papua New Guinea      | 9,145   | 1,374  | 15.0 | 369   | 4.0  | 721    | 7.9  | 1,084  | 11.9 |
| 134 | Paraguay              | 7,485   | 983    | 13.1 | 15    | 0.2  | 66     | 0.9  | 176    | 2.4  |
| 135 | Peru                  | 35,696  | 3,396  | 9.5  | 157   | 0.4  | 462    | 1.3  | 1,080  | 3.0  |
| 136 | Philippines           | 105,153 | 30,483 | 29.0 | 1,305 | 1.2  | 7,367  | 7.0  | 17,115 | 16.3 |
| 137 | Poland                | 39,207  | 5,280  | 13.5 | 17    | 0.0  | 27     | 0.1  | 59     | 0.1  |
| 138 | Portugal              | 10,118  | 440    | 4.4  | 2     | 0.0  | 3      | 0.0  | 7      | 0.1  |
| 139 | Puerto Rico           | 3,659   | 429    | 11.7 | 0     | 0.0  | 0      | 0.0  | 0      | 0.0  |
| 140 | Romania               | 33,822  | 6,548  | 19.4 | 149   | 0.4  | 312    | 0.9  | 656    | 1.9  |
| 141 | Russia                | 142,717 | 18,394 | 12.9 | 4     | 0.0  | 62     | 0.0  | 692    | 0.5  |
| 142 | Rwanda                | 13,488  | 1,284  | 9.5  | 679   | 5.0  | 1,001  | 7.4  | 1,164  | 8.6  |
| 143 | San Marino            | 32      | 2      | 6.5  | 0     | 0.0  | 0      | 0.0  | 0      | 0.0  |
| 144 | Sao Tome and Principe | 208     | 26     | 12.4 | 9     | 4.5  | 17     | 8.2  | 22     | 10.8 |
| 145 | Saudi Arabia          | 36,811  | 2,437  | 6.6  | 0     | 0.0  | 0      | 0.0  | 0      | 0.0  |
| 146 | Senegal               | 16,174  | 2,376  | 14.7 | 790   | 4.9  | 1,538  | 9.5  | 2,091  | 12.9 |
| 147 | Serbia                | 6,977   | 1,404  | 20.1 | 1     | 0.0  | 10     | 0.2  | 87     | 1.3  |
| 148 | Sierra Leone          | 6,782   | 1,296  | 19.1 | 626   | 9.2  | 1,055  | 15.6 | 1,233  | 18.2 |
| 149 | Singapore             | 4,439   | 577    | 13.0 | 0     | 0.0  | 0      | 0.0  | 0      | 0.0  |
| 150 | Slovakia              | 5,440   | 1,401  | 25.7 | 17    | 0.3  | 21     | 0.4  | 36     | 0.7  |
| 151 | Slovenia              | 2,180   | 472    | 21.7 | 0     | 0.0  | 0      | 0.0  | 0      | 0.0  |
| 152 | Solomon Islands       | 585     | 117    | 20.1 | 29    | 4.9  | 68     | 11.6 | 99     | 16.9 |
| 153 | Somalia               | 11,002  | 1,831  | 16.6 | 0     | 0.0  | 0      | 0.0  | 0      | 0.0  |
| 154 | South Africa          | 59,943  | 3,663  | 6.1  | 682   | 1.1  | 1,364  | 2.3  | 2,086  | 3.5  |
| 155 | South Korea           | 50,972  | 10,351 | 20.3 | 26    | 0.1  | 51     | 0.1  | 103    | 0.2  |
| 156 | South Sudan           | 16,743  | 5,437  | 32.5 | 4,686 | 28.0 | 5,215  | 31.1 | 5,399  | 32.2 |
| 157 | Spain                 | 51,999  | 5,859  | 11.3 | 38    | 0.1  | 61     | 0.1  | 120    | 0.2  |
| 158 | Sri Lanka             | 21,387  | 4,140  | 19.4 | 30    | 0.1  | 354    | 1.7  | 1,502  | 7.0  |
| 159 | St. Lucia             | 169     | 17     | 10.3 | 1     | 0.5  | 2      | 1.0  | 3      | 2.0  |
| 160 | Sudan                 | 42,574  | 8,778  | 20.6 | 1,006 | 2.4  | 3,789  | 8.9  | 6,875  | 16.1 |
| 161 | Suriname              | 619     | 233    | 37.7 | 45    | 7.3  | 70     | 11.3 | 108    | 17.5 |
| 162 | Sweden                | 10,064  | 978    | 9.7  | 2     | 0.0  | 2      | 0.0  | 5      | 0.0  |
| 163 | Switzerland           | 8,693   | 1,660  | 19.1 | 1     | 0.0  | 0      | 0.0  | 1      | 0.0  |
| 164 | Syria                 | 26,550  | 3,548  | 13.4 | 1,603 | 6.0  | 2,730  | 10.3 | 3,294  | 12.4 |
| 165 | Tajikistan            | 9,381   | 1,671  | 17.8 | 37    | 0.4  | 199    | 2.1  | 665    | 7.1  |
| 166 | Tanzania              | 54,708  | 7,982  | 14.6 | 3,937 | 7.2  | 6,149  | 11.2 | 7,339  | 13.4 |
| 167 | Thailand              | 74,946  | 25,431 | 33.9 | 5     | 0.0  | 109    | 0.1  | 1,765  | 2.4  |
| 168 | Timor-Leste           | 1,322   | 317    | 24.0 | 62    | 4.7  | 198    | 15.0 | 286    | 21.6 |
| 169 | Togo                  | 8,631   | 1,349  | 15.6 | 621   | 7.2  | 978    | 11.3 | 1,211  | 14.0 |

|     |                          |         |        |      |       |     |       |      |       |      |
|-----|--------------------------|---------|--------|------|-------|-----|-------|------|-------|------|
| 170 | Tonga                    | 100     | 11     | 11.4 | 0     | 0.1 | 1     | 0.8  | 3     | 2.9  |
| 171 | Trinidad and Tobago      | 1,377   | 291    | 21.1 | 1     | 0.1 | 3     | 0.2  | 18    | 1.3  |
| 172 | Tunisia                  | 11,707  | 1,334  | 11.4 | 6     | 0.0 | 62    | 0.5  | 319   | 2.7  |
| 173 | Turkey                   | 79,087  | 11,269 | 14.2 | 5     | 0.0 | 154   | 0.2  | 961   | 1.2  |
| 174 | Turkmenistan             | 9,850   | 2,419  | 24.6 | 25    | 0.3 | 255   | 2.6  | 804   | 8.2  |
| 175 | Turks and Caicos Islands | 43      | 4      | 9.1  | 0     | 0.0 | 0     | 0.0  | 0     | 0.0  |
| 176 | Uganda                   | 42,049  | 5,438  | 12.9 | 2,287 | 5.4 | 3,834 | 9.1  | 4,788 | 11.4 |
| 177 | Ukraine                  | 43,674  | 5,407  | 12.4 | 1     | 0.0 | 19    | 0.0  | 175   | 0.4  |
| 178 | United Arab Emirates     | 8,967   | 638    | 7.1  | 0     | 0.0 | 0     | 0.0  | 0     | 0.0  |
| 179 | United Kingdom           | 66,928  | 7,390  | 11.0 | 18    | 0.0 | 30    | 0.0  | 41    | 0.1  |
| 180 | United States            | 340,766 | 42,590 | 12.5 | 455   | 0.1 | 570   | 0.2  | 783   | 0.2  |
| 181 | Uruguay                  | 3,357   | 226    | 6.7  | 0     | 0.0 | 1     | 0.0  | 7     | 0.2  |
| 182 | Uzbekistan               | 33,668  | 6,715  | 19.9 | 862   | 2.6 | 2,876 | 8.5  | 5,243 | 15.6 |
| 183 | Vanuatu                  | 272     | 30     | 11.1 | 4     | 1.5 | 12    | 4.5  | 22    | 8.2  |
| 184 | Venezuela                | 31,718  | 5,843  | 18.4 | 0     | 0.0 | 0     | 0.0  | 0     | 0.0  |
| 185 | Vietnam                  | 98,839  | 45,504 | 46.0 | 465   | 0.5 | 2,133 | 2.2  | 8,843 | 8.9  |
| 186 | Yemen                    | 30,183  | 2,388  | 7.9  | 1,106 | 3.7 | 1,812 | 6.0  | 2,193 | 7.3  |
| 187 | Zambia                   | 18,684  | 2,611  | 14.0 | 1,621 | 8.7 | 2,024 | 10.8 | 2,327 | 12.5 |
| 188 | Zimbabwe                 | 14,360  | 1,426  | 9.9  | 468   | 3.3 | 869   | 6.1  | 1,157 | 8.1  |
